# Supplementary material for: Chromosome-Level Genome Assembly of a Fragrant Japonica Rice Cultivar ‘Changxianggeng 1813’ Provides Insights into Genomic Variations between Fragrant and Non-Fragrant Japonica Rice
Source: MDPI journal article supplement (doi:10.3390/ijms23179705), 2022-08-26
Supplement: s1 [file s1]

## Supplementary Tables

**Table S1.** The statistics of sequencing data used for the ‘Changxianggeng 1813’ genome assembly.

| Libraries | Insert size (bp) | Clean data (Gb) | Mean read length (bp) | Sequence coverage (×) |
|-----------|------------------|-----------------|-----------------------|-----------------------|
| Illumina  | 350 bp           | 28.21           | 150                   | 74.48                 |
| Nanopore  | –                | 51.59           | 10,760                | 136.20                |
| Hi-C      | 350 bp           | 41.45           | 150                   | 109.43                |
| Total     | –                | 121.15          | –                     | 320.11                |

**Table S2.** Estimation of genome size based on 19-mer statistics.

| K-mer | K-mer_number   | K-mer_depth | genome size | heterozygosity rate |
|-------|----------------|-------------|-------------|---------------------|
| 19    | 18,243,910,499 | 45.78       | 394.39 bp   | 0.08%               |

**Table S3.** The length distribution of each chromosome.

| Chromosome ID | Length (bp) |
|---------------|-------------|
| chr1          | 24,418,402  |
| chr2          | 29,831,576  |
| chr3          | 28,654,189  |
| chr4          | 30,175,499  |
| chr5          | 28,379,153  |
| chr6          | 29,585,998  |
| chr7          | 43,598,337  |
| chr8          | 36,284,563  |
| chr9          | 32,053,675  |
| chr10         | 35,158,174  |
| chr11         | 37,981,760  |
| chr12         | 22,655,339  |

**Table S4.** Validation of the completeness of the genome assembly of ‘Changxianggeng 1813’ using the BUSCO approach.

| Description                     | Number of genes | Percentage (%) |
|---------------------------------|-----------------|----------------|
| Complete BUSCOs                 | 1,552           | 96.2           |
| Complete and single-copy BUSCOs | 1,514           | 93.8           |
| Complete Duplicated BUSCOs      | 38              | 2.4            |
| Fragmented BUSCOs               | 9               | 0.6            |
| Missing BUSCOs                  | 53              | 3.2            |

**Table S5.** Summary statistics of repeat sequences in the ‘Changxianggeng 1813’ genome.

| Type           | De novo + rebase |             | TE protiens |             | Combined TEs |             |
|----------------|------------------|-------------|-------------|-------------|--------------|-------------|
|                | Length (bp)      | % in genome | Length (bp) | % in genome | Length (bp)  | % in genome |
| DNA            | 92,052,249       | 24.3        | 8,063,604   | 2.13        | 92,687,141   | 24.47       |
| LINE           | 6,484,115        | 1.71        | 3,153,876   | 0.83        | 6,741,267    | 1.78        |
| SINE           | 447,867          | 0.12        | 0           | 0           | 447,867      | 0.12        |
| LTR            | 91,097,914       | 24.05       | 26,154,923  | 6.91        | 91,493,064   | 24.15       |
| Tandem repeats | 3,661,198        | 0.97        | 0           | 0           | 3,661,198    | 0.97        |
| Other          | 769              | 0           | 0           | 0           | 769          | 0           |
| Unknown        | 3,742,890        | 0.99        | 7,938       | 0           | 3,750,828    | 0.99        |
| Total          | 197,677,261      | 52.19       | 37,375,718  | 9.87        | 201,310,513  | 53.15       |

**Table S6.** Summary statistics of functional protein-coding genes in the ‘Changxianggeng 1813’ genome.

| Database      | Number | Percent (%) |
|---------------|--------|-------------|
| Uniprot       | 31,309 | 97.34%      |
| Pfam          | 25,333 | 78.76%      |
| GO            | 23,775 | 73.92%      |
| KEGG          | 10,869 | 33.79%      |
| NR            | 29,105 | 90.49%      |
| InterProScan  | 30,508 | 94.85%      |
| All annotated | 31,671 | 98.46%      |

**Table S7.** Summary statistics of non-coding RNAs in the ‘Changxianggeng 1813’ genome.

| Genome. |          |      |                     |                   |             |
|---------|----------|------|---------------------|-------------------|-------------|
| Type    |          | Copy | Average length (bp) | Total length (bp) | % of genome |
| miRNA   |          | 1756 | 200                 | 351273            | 0.092739    |
| tRNA    |          | 715  | 75                  | 53951             | 0.014243    |
| rRNA    | rRNA     | 322  | 167                 | 53729             | 0.014185    |
|         | 18S      | 8    | 1769                | 14153             | 0.003737    |
|         | 28S      | 19   | 209                 | 3980              | 0.001051    |
|         | 5.8S     | 15   | 157                 | 2358              | 0.000623    |
|         | 5S       | 280  | 119                 | 33238             | 0.008775    |
| snRNA   | snRNA    | 731  | 115                 | 84116             | 0.022207    |
|         | CD-box   | 582  | 109                 | 63189             | 0.016682    |
|         | HACA-box | 64   | 130                 | 8300              | 0.002191    |
|         | splicing | 85   | 149                 | 12627             | 0.003334    |

**Table S8.** Summary statistics of gene families among six *Oryza* species/subspecies/cultivars.

| Accession               | Gene number | Genes in families | Family number | Unique families | Average genes per family |
|-------------------------|-------------|-------------------|---------------|-----------------|--------------------------|
| ‘Changxianggeng 1813’   | 32165       | 32165             | 26658         | 1576            | 1.21                     |
| Nipponbare              | 24211       | 24211             | 21237         | 1370            | 1.14                     |
| <i>O. rufipogon</i>     | 47593       | 47593             | 34689         | 3148            | 1.37                     |
| <i>O. sativa indica</i> | 37358       | 37358             | 29988         | 2267            | 1.25                     |
| <i>O. nivara</i>        | 48361       | 48361             | 34596         | 3384            | 1.4                      |
| <i>O. barthii</i>       | 41680       | 41680             | 31673         | 2517            | 1.32                     |
