# Supplementary material for: Chromosome-Level Genome Assembly of a Fragrant Japonica Rice Cultivar ‘Changxianggeng 1813’ Provides Insights into Genomic Variations between Fragrant and Non-Fragrant Japonica Rice
Source: MDPI journal article supplement (doi:10.3390/ijms23179705), 2022-08-26
Supplement: s1 [file s1]

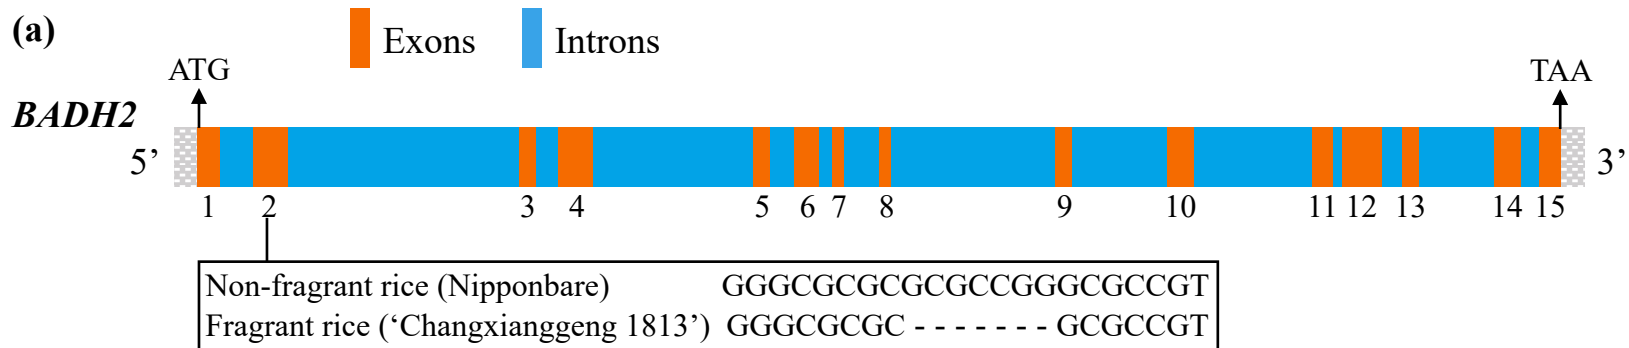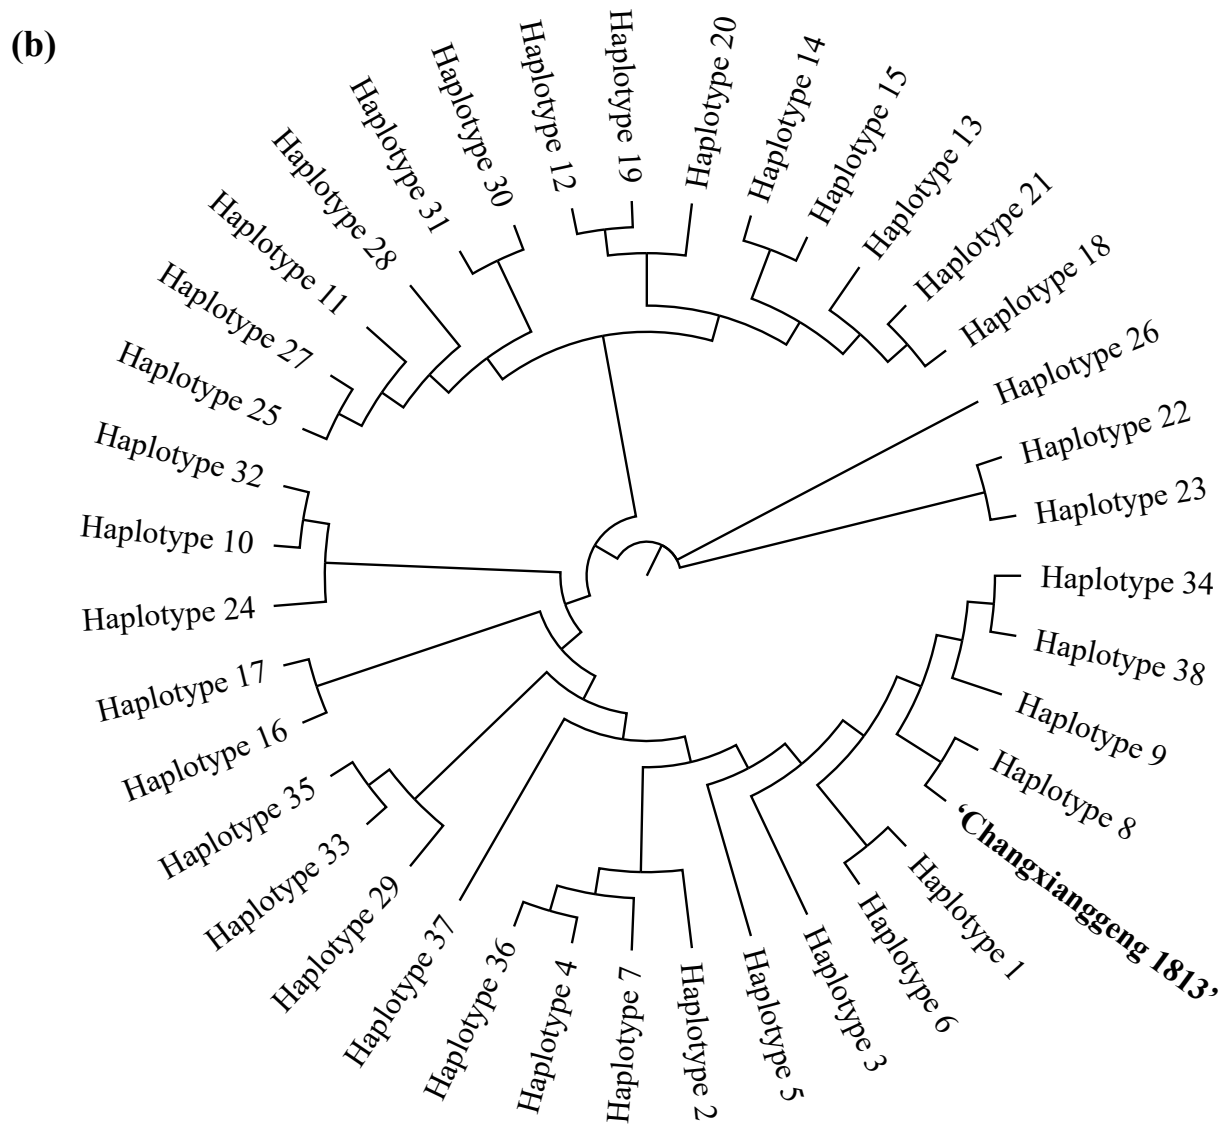

Figure S1: (a) Structure of the BADH2 gene showing 5' UTR, initiation codon (ATG), 15 exons, 14 introns, stop codon (ATT) and 3' UTRs. The partial nucleotide sequence of second exon is shown for both non-fragrant (Nipponbare) and fragrant ( 'Changxianggeng 1813' ) rice. (b) Phylogenetic relationships among the BADH2 gene in 'Changxianggeng 1813' and 38 BADH2 haplotypes previously identified (see [2] for full details);
